# Supplementary material
Source: publisher figshare collection journal article supplement (https://karger.figshare.com/ndownloader/files/13747271)

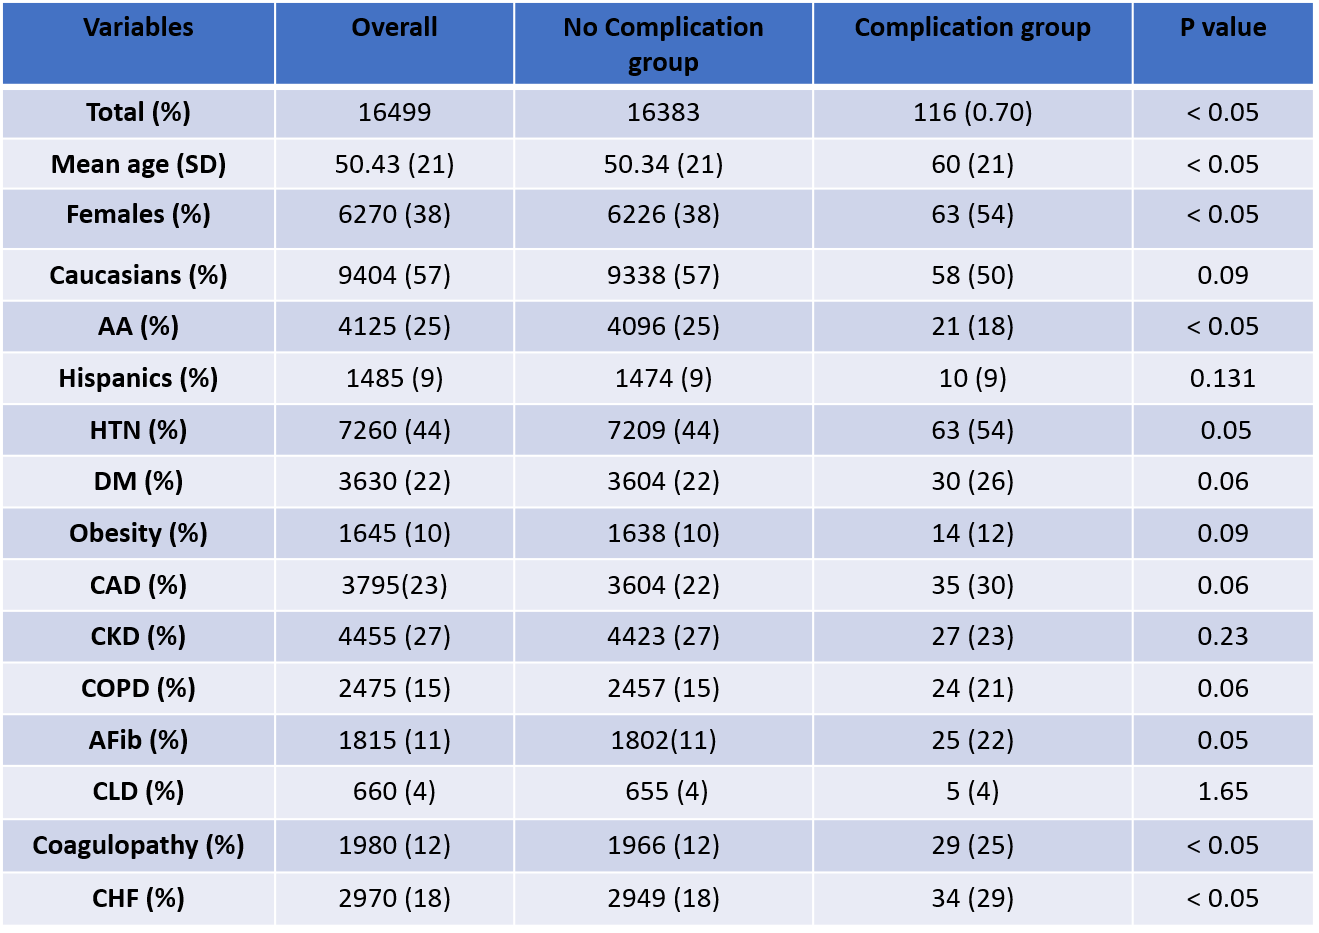


**Supplemental table-2: Baseline characters and comorbidities of cohort 1**

Supplement: Supplementary file 1 [file 13747271]
